# Supplementary material for: Manganese–cobalt oxide as an effective bifunctional cathode for rechargeable Zn–air batteries with a compact quad-cell battery design
Source: Royal Society of Chemistry journal article supplement (doi:10.1039/d2cp06035c), 2023-01-01
Supplement: d2cp06035c1.pdf [file d2cp06035c1.pdf]

**Supplementary Information**

**Manganese-Cobalt Oxide as Effective Bifunctional Cathode for Rechargeable Zn-Air  
Battery with a Compact Quad-Cell Battery Design**

Khaleel Ahmed J. Dilshad and M. K. Rabinal\*

Dept. of Physics, Karnatak University, Dharwad – 580003, India

\*Corresponding Author: [mkrabinal@yahoo.com](mailto:mkrabinal@yahoo.com)

Figure S1 (a)

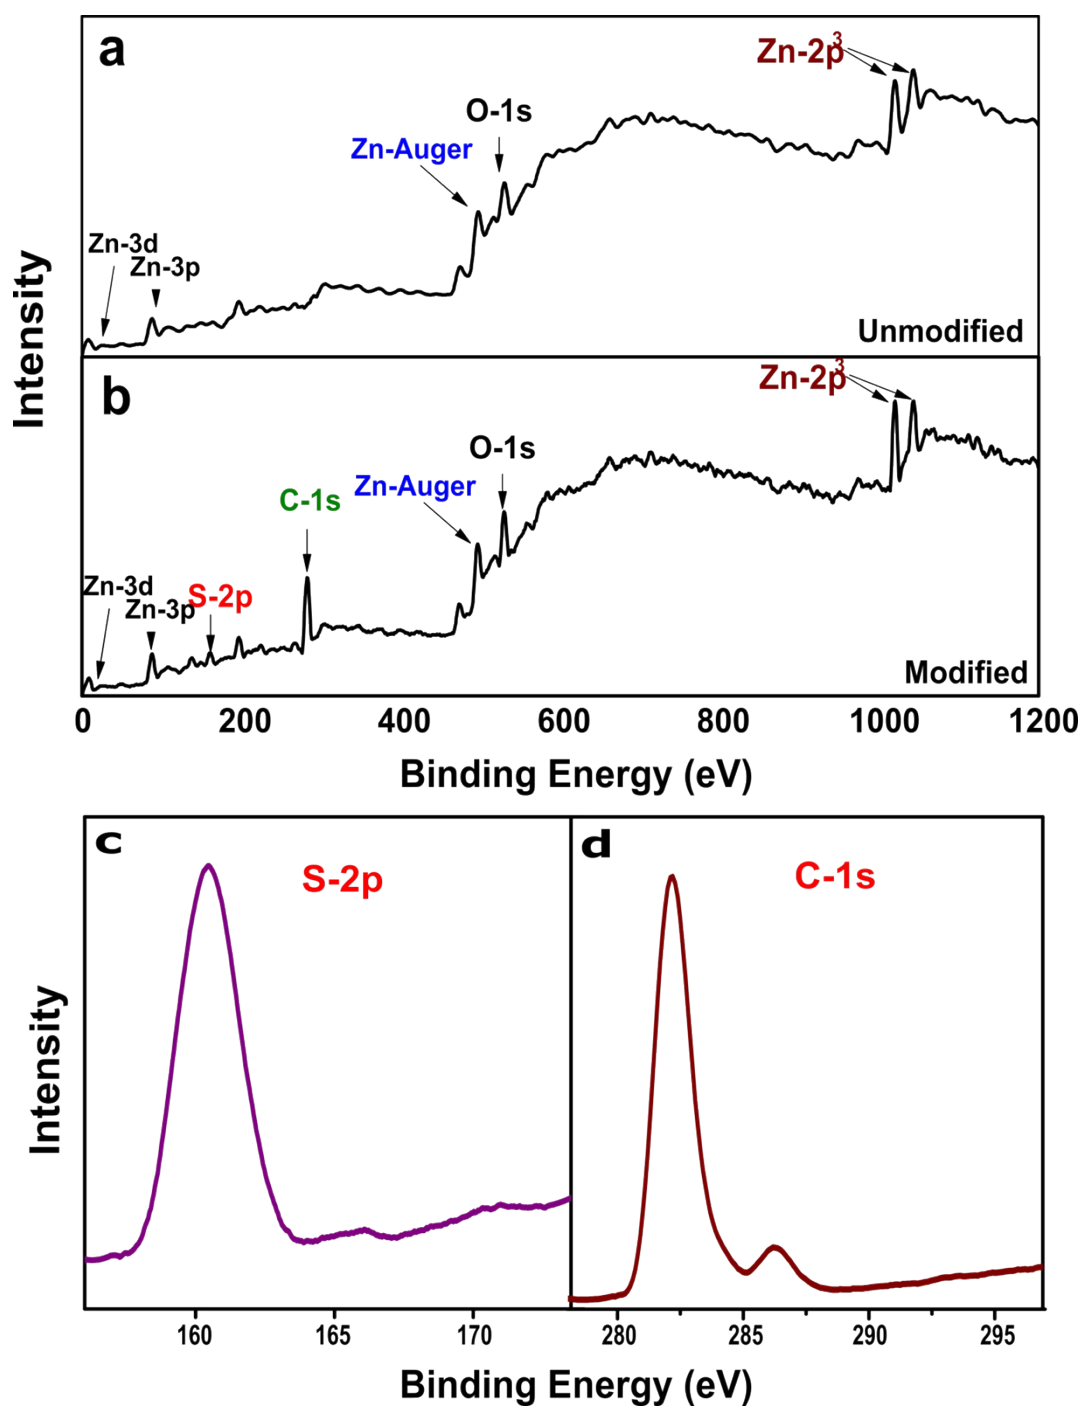

**Figure S1a** : Molecularly modified surface characterization results: **a)** full survey XPS spectrum of MPA treated Zn substrate prior to electrodeposition, **b)** unmodified zinc, **c)** and **d)** are high resolution XPS core spectra of S-2p and C-1s, respectively

**Figure S1 (b)**

FESEM images of unmodified and modified Zn are depicted in Figure S1. Clearly, the changes in surface structure of MPA-modified Zn can be observed compared to unmodified planar Zn.

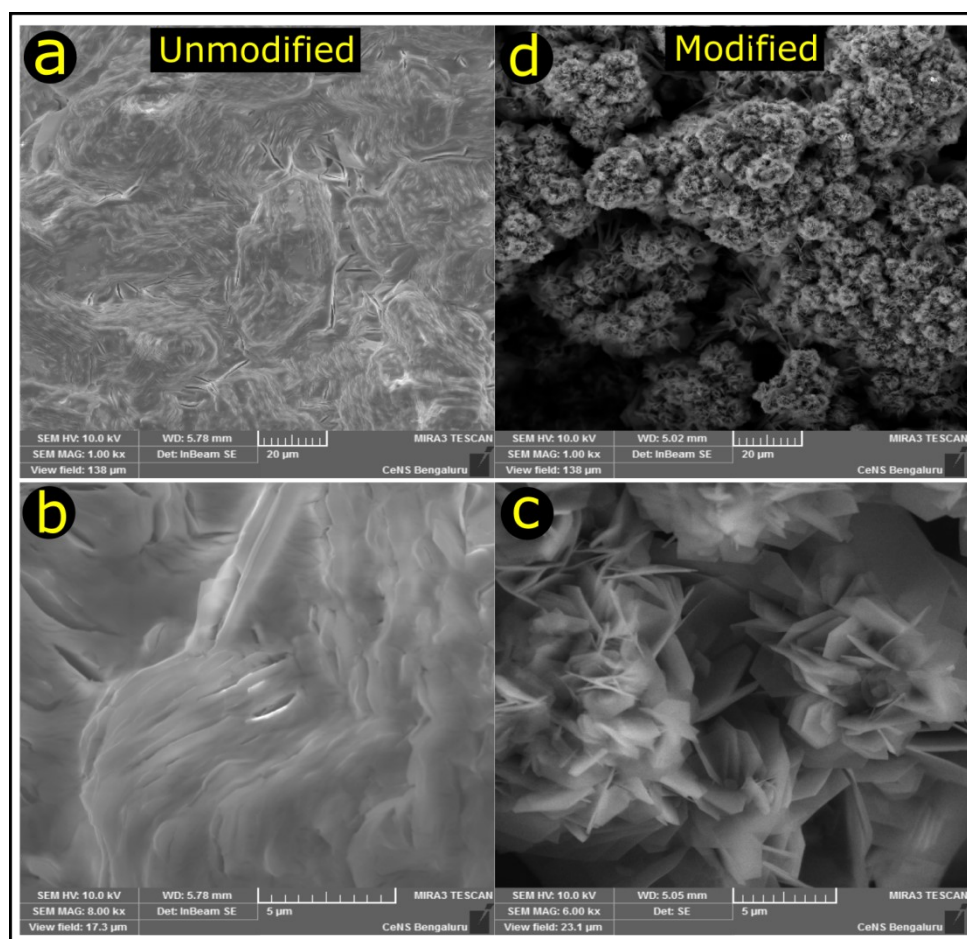

**Figure S1b:** FESEM images of electrodeposited zinc on unmodified Zn substrate [(a, b) low and high magnification, respectively], and modified Zn [(c, d) low and high magnification, respectively].

**Figure S2**

Electrochemical performance comparison data of Zn-Air battery assembled before and after zinc plate modification is shown below. The cycle stability of battery is examined by using a ‘test-cathode’. Clearly, the modified Zn outperforms the unmodified planar Zn anode which is the basis for using modified anode opposite to bimetallic oxide air cathode catalyst in the present study.

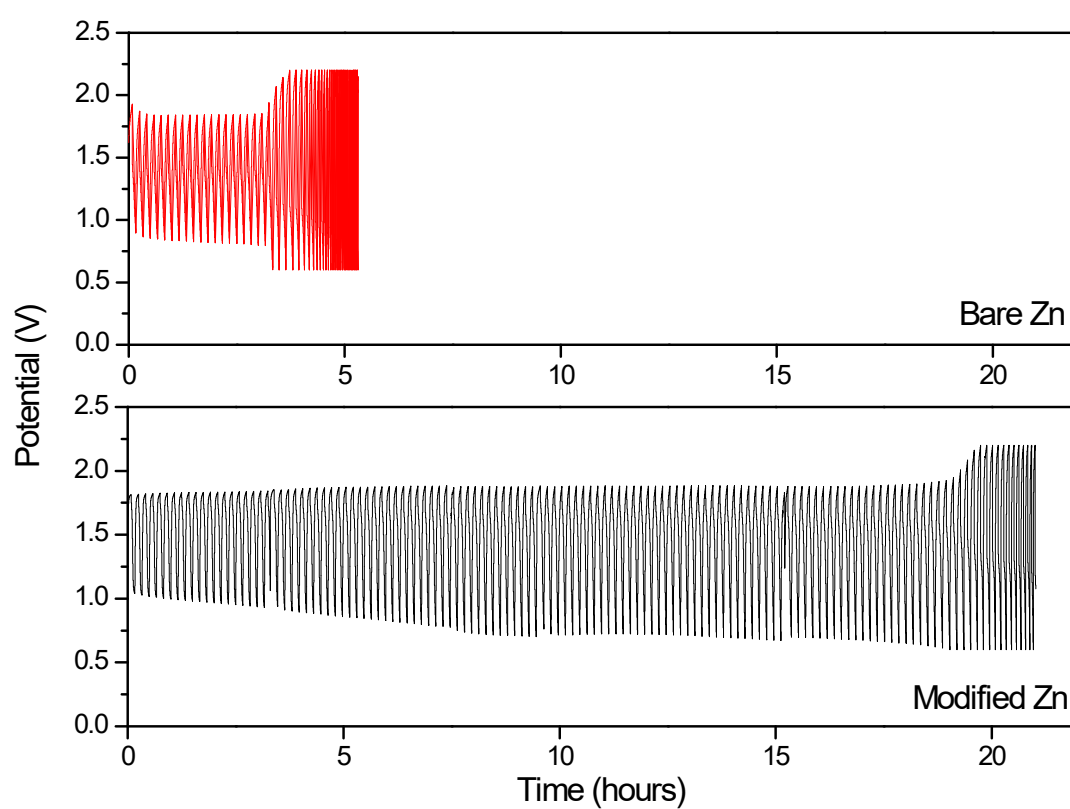

**Figure S2:** Comparative galvanostatic charge-discharge response of the battery assembled with modified and unmodified anodes with 10 min/ cycle at a current density of 5 mA cm<sup>-2</sup>.

Figure S3

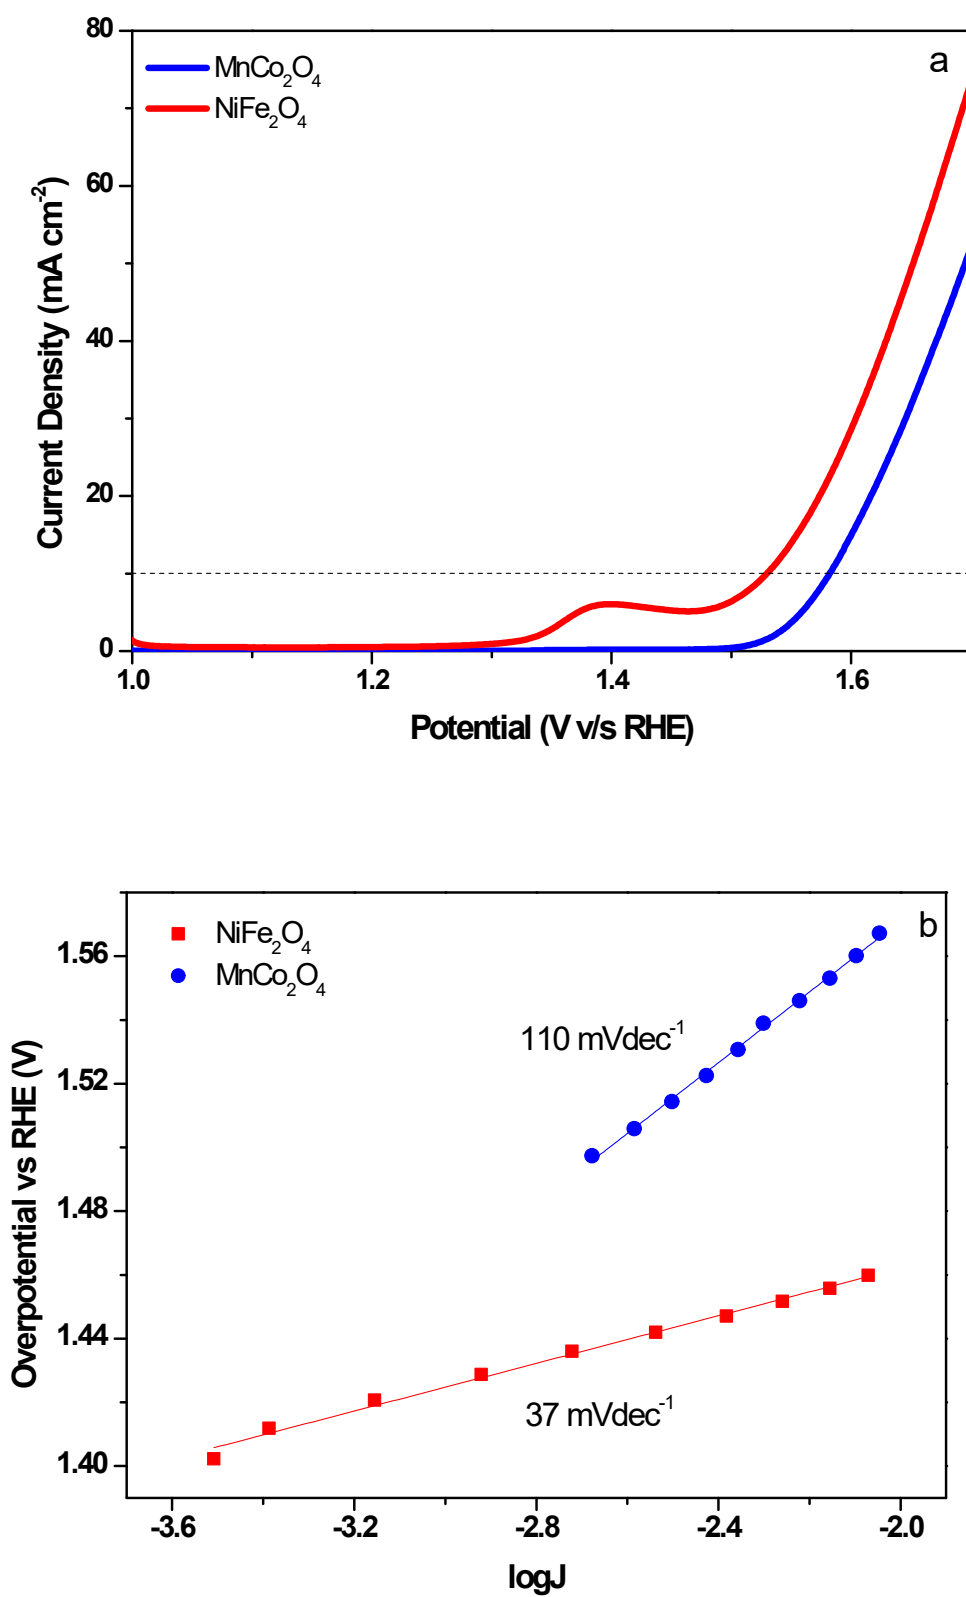

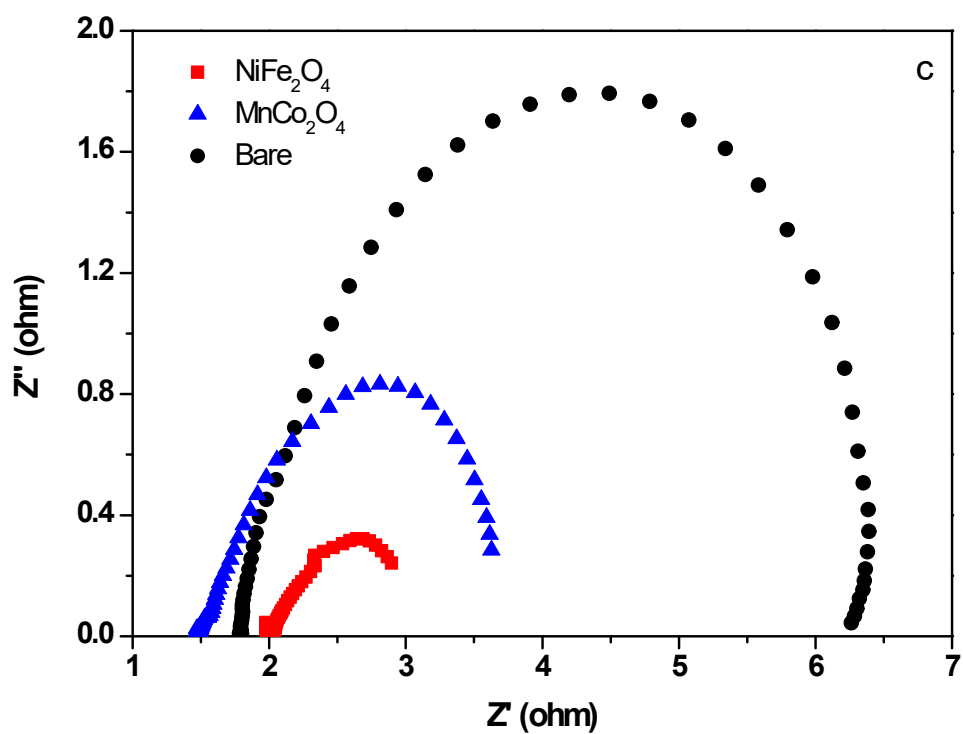

**Figure S3:** (a) OER polarization curves and (b) the corresponding Tafel plots of  $\text{NiFe}_2\text{O}_4$  and  $\text{MnCo}_2\text{O}_4$  catalysts. (c) EIS Nyquist plots and fitting curves at 1.49 V vs. RHE.

## Material Stability

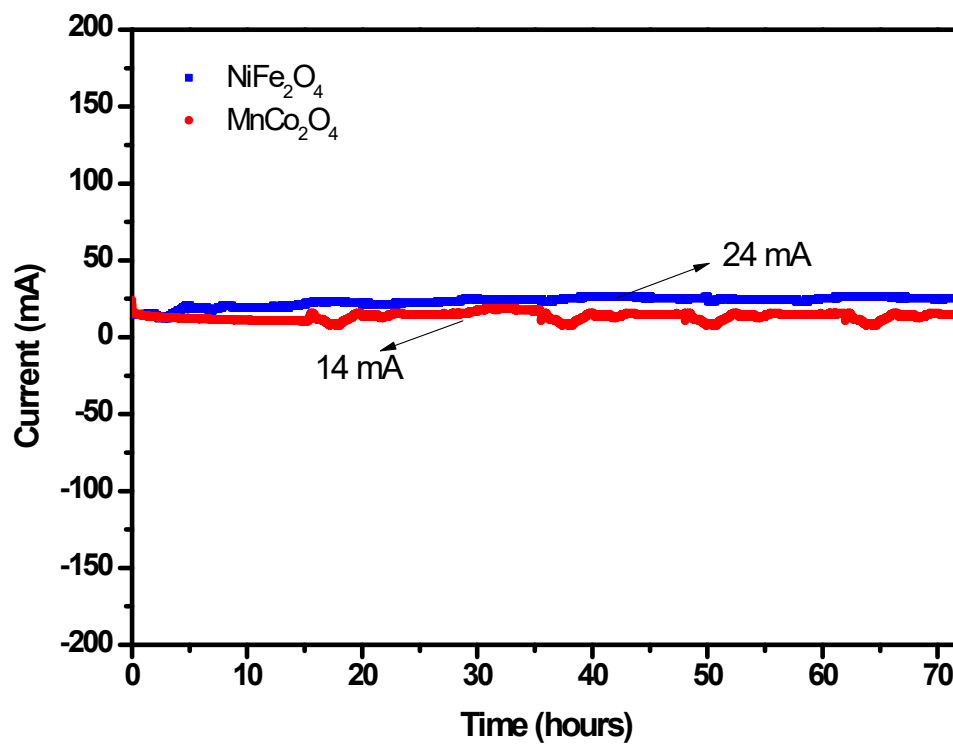

Figure S4: Material stability test of prepared catalysts tested for 72 hours.

**Figure S5**

The electrochemical surface area (ECSA) is estimated from double-layer electrochemical capacitance ( $C_{DL}$ ). Figure S5 (a & b) represents the typical CV curves in non-faradaic region at a scan rate ranging from 50 to 150  $\text{mV s}^{-1}$  for  $\text{NiFe}_2\text{O}_4$  and  $\text{MnCo}_2\text{O}_4$  respectively. At last, the calculated capacitance was further divided by average specific capacitance of  $40 \mu\text{F cm}^{-2}$  for the transition metal oxide in 1 M KOH solution to obtain ECSA.

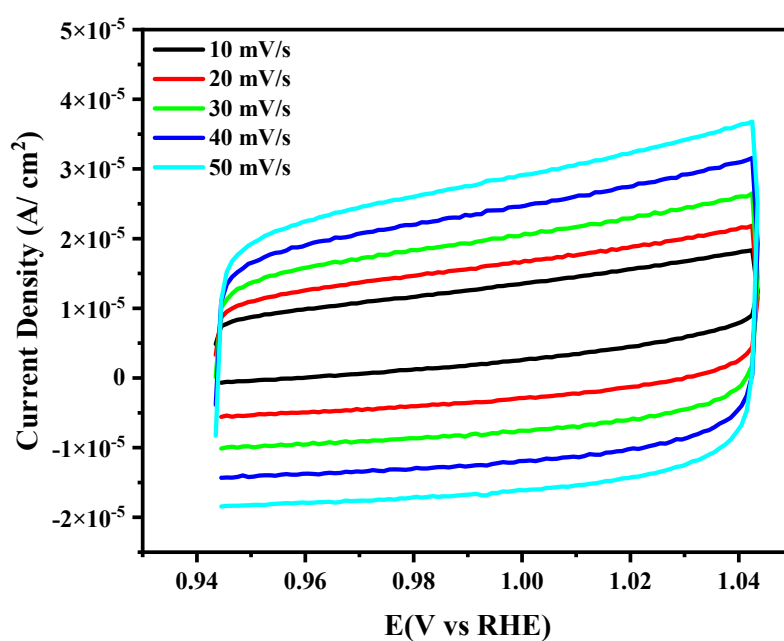



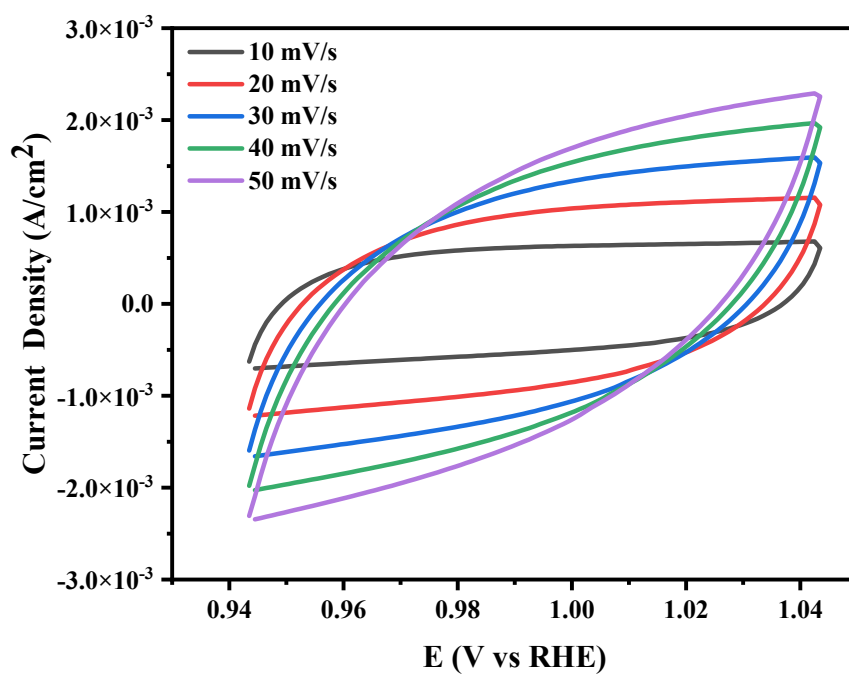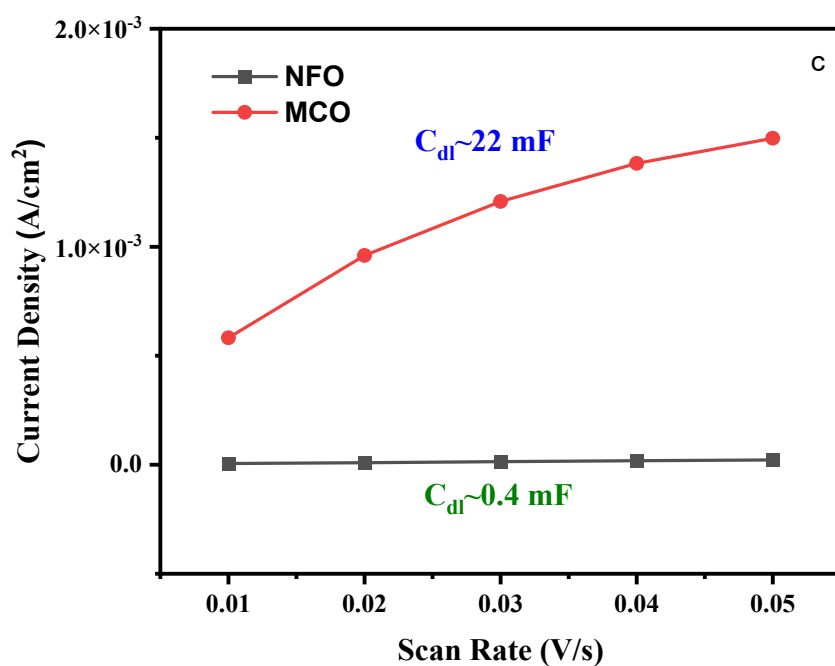

**Figure S5:** CV curves tested in a non-Faradaic potential range at a scan rate range of 50 to 150 mV s<sup>-1</sup> for (a) NiFe<sub>2</sub>O<sub>4</sub>, (b) MnCo<sub>2</sub>O<sub>4</sub>, and (c) the calculated double-layer electrochemical capacitance.

| <b>Sample</b>                        | <b>C<sub>DL</sub> (mF)</b> | <b>ECSA (cm<sup>2</sup>)</b> |
|--------------------------------------|----------------------------|------------------------------|
| NiFe <sub>2</sub> O <sub>4</sub> /NF | 0.4                        | 10                           |
| MnCo <sub>2</sub> O <sub>4</sub> /NF | 22                         | 550                          |

Figure S6

Accelerated Data Test (ADT)

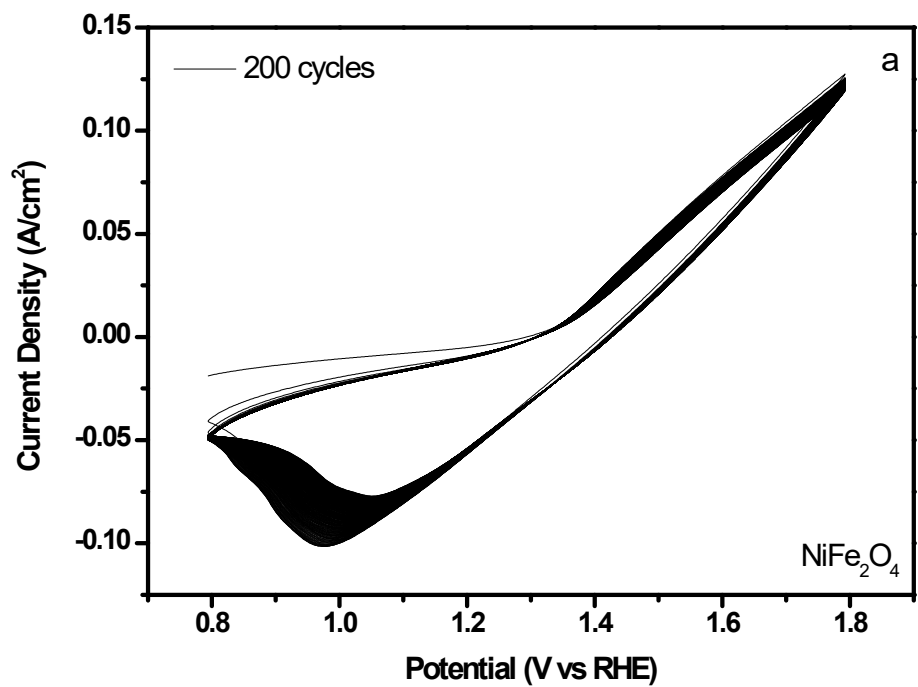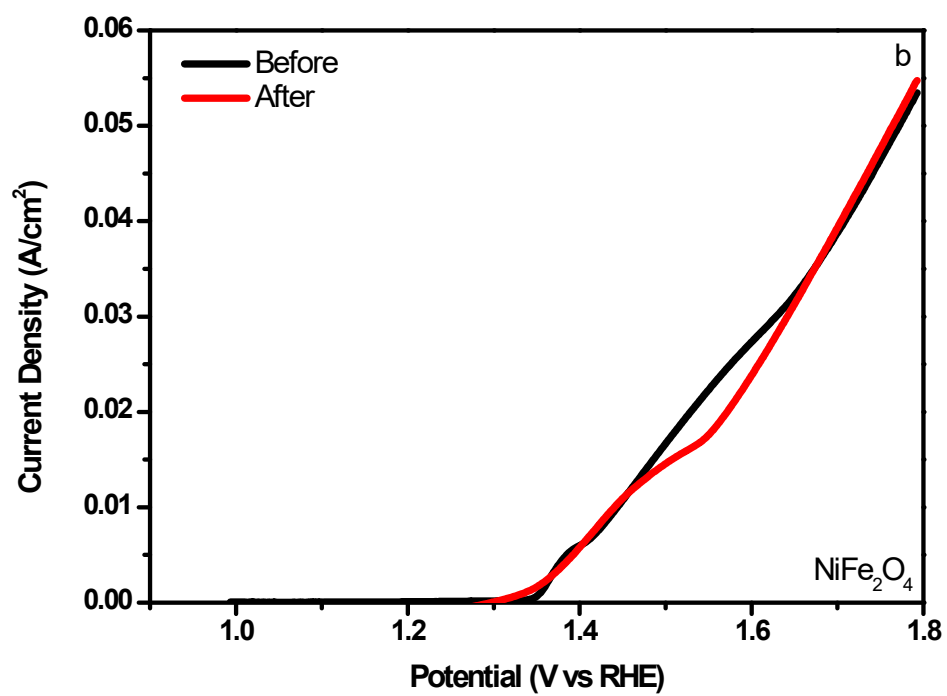

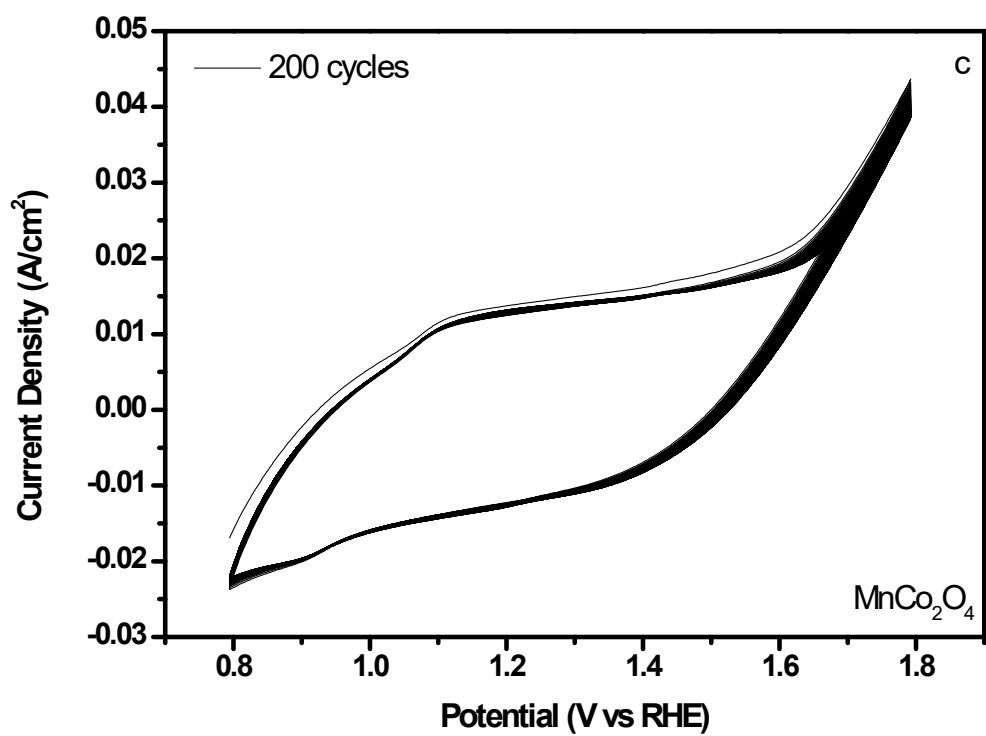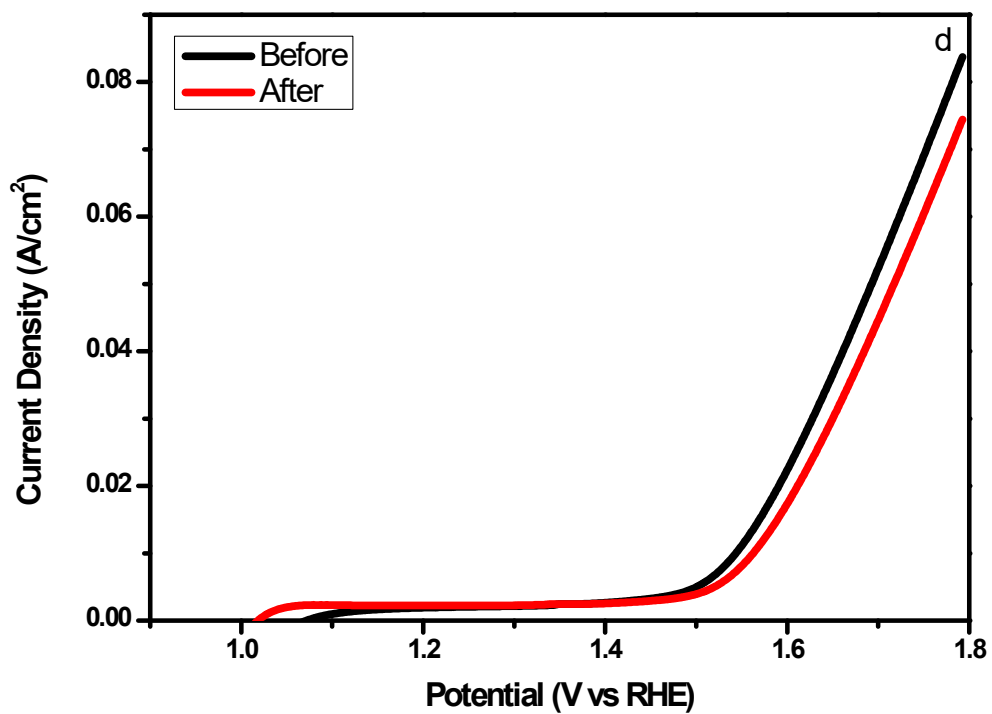

Figure S6: ADT for LSV before and after 200 cyclic voltammetry cycles.
